# Supplementary material for: Geographic Patterns of Genome Admixture in Latin American Mestizos
Source: PLoS Genet. 2008 Mar 21;4(3):e1000037. doi: 10.1371/journal.pgen.1000037 (PMC2265669; doi:10.1371/journal.pgen.1000037)
Supplement: Table S1 — Location of sampling site, current population size and relative pre-Columbian population density in the region. * Representing about 10, 5 and 1 individuals per square mile, according to available estimates13;14. Population size information from compilation in(http://www.citypopulation.de/cities.html). (0.03 MB XLS) [file pgen.1000037.s002.xls]

## Sheet: Sheet1
Table S1. Location of sampling site, current population size and relative pre-Columbian population density in the region.
Sampling site	(n)	Country	Latitude	Longitude	Population	Pre-Columbian density*
Mexico City	19	Mexico	19°24'N	99°12'W	18000000	High
Oriente	20	Guatemala	14°38'N	90°31'W	108000	High
CVCR	20	Costa Rica	09°56'N	84°05W	2500000	Medium
Peque	20	Colombia	07°19'N	75°50'W	2000	Medium
Medellin	20	Colombia	06°15'N	75°35'W	2500000	Medium
Cundinamarca	19	Colombia	04°36'N	74°05'W	2500000	Medium
Pasto	19	Colombia	01°13'N	77°17'W	365000	High
Paposo	20	Chile	25°03’S	70°16’W	1000	High
Quetalmahue	20	Chile	41°28’S	73°32’W	1000	High
Salta	19	Argentina	24°47’S	65°25’W	469000	High
Tucuman	19	Argentina	26°49’S	65°13’W	738000	Medium
Catamarca	14	Argentina	28°28’S	65°47’W	171000	Medium
RGS	20	Brazil	31°00’S	54°00’W	200000	Low
* Representing about 10, 5 and 1 individuals per square mile, according to available estimates13;14.
Population size information from compilation in (http://www.citypopulation.de/cities.html).
